# Supplementary material for: Polydatin Beneficial Effects in Zebrafish Larvae Undergoing Multiple Stress Types
Source: PubMed Central journal article supplement (PMC7908490; doi:10.3390/ijerph18031116), 2021-01-27
Supplement: ijerph-18-01116-s001.pdf [file ijerph-18-01116-s001.pdf]

Supplementary Information Pessina et al.,

*Fish exposure to CuSO<sub>4</sub>*

Embryos, obtained by crossing pathogen-free AB adults, were maintained in E3 medium till hatching (T<sub>0</sub>= 72 hrs) at 28°C. At hatching, larvae were transferred in petri dish and at 75 hpf were exposed for 2 h (till 77 hph) to CuSO<sub>4</sub> (10 μM) and then moved back in E3 medium. The activation of the immune response in terms of neutrophil localization was monitored after 1, 3 and 6 hours after the end of the exposure.

As shown in SFig 1, the highest number of neutrophils was visualized in the head (b) within 1 h post exposure and the number decreased after 3 (c) and 6 hours (d). (a) Shows larvae before CuSO<sub>4</sub> exposure.

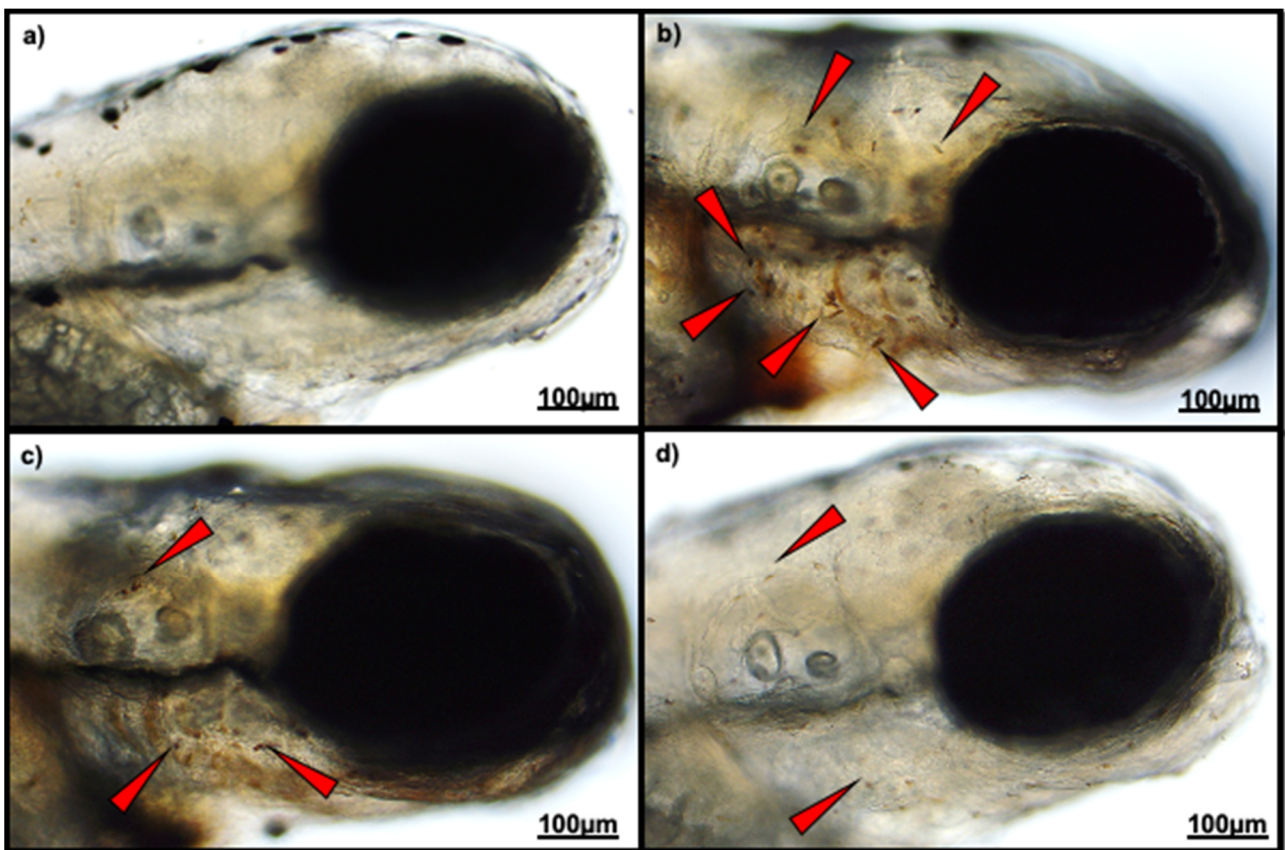

**Figure S1.** Representative images showing neutrophil localization in the head (a) before CuSO<sub>4</sub> exposure and (b) 1 h post CuSO<sub>4</sub> exposure, (c) 3 h post CuSO<sub>4</sub> exposure and (d) 6 h post CuSO<sub>4</sub> exposure. Red arrows indicate neutrophils. Scale bar 100 μM.

## Chemical stress trial design

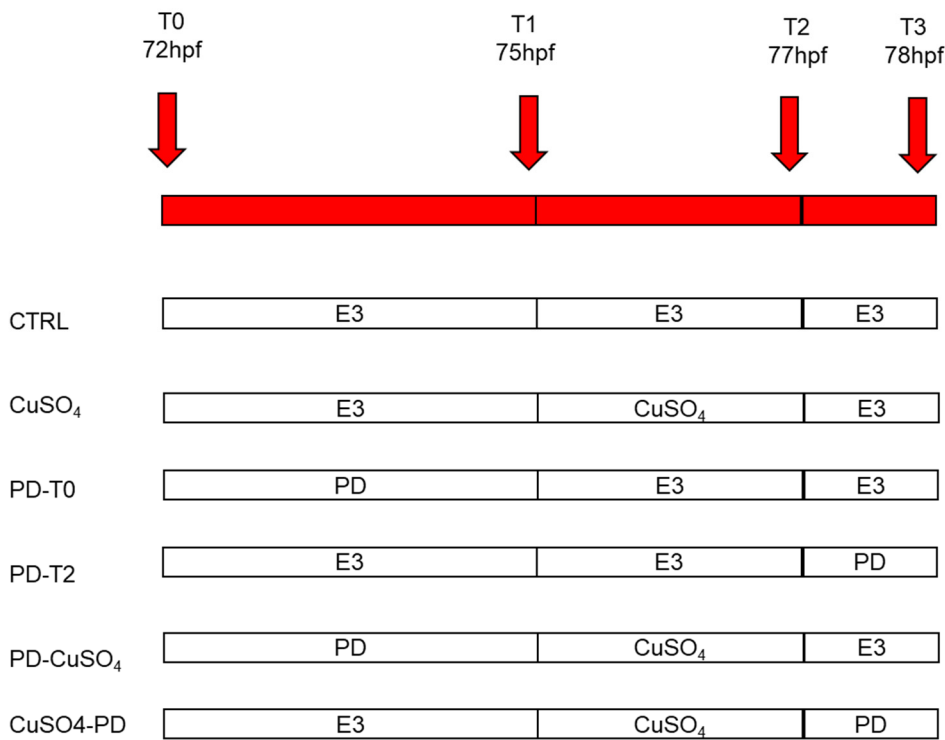

**Figure S2.** Schematic representation of the **Chemical stress trial** design. Red line shows the different trial time points. White lines show the time of exposure to PD and/or CuSO<sub>4</sub> in the experimental groups. E3 = E3 medium, PD = polydatin, T0 = 72hpf, T1 = 75hpf, T2 = 77hpf, T3 = 78hpf

## Mechanical stress trial design

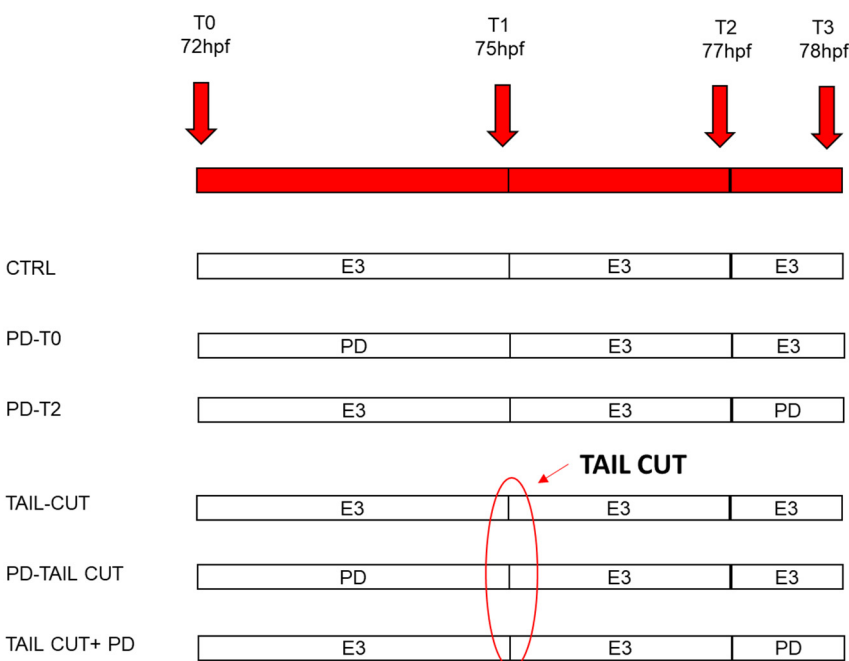

**Figure S3.** Schematic representation of the **mechanical stress trial** design. Red line shows the different trial time points. White lines show the time of exposure to PD in the experimental groups. Caudal fins were amputated at 75 hpf (T1). E3 = E3 medium, PD = polydatin, T0 = 72hpf, T1 = 75hpf, T2 = 77hpf, T3 = 78 hpf

**Table S1.** Primer List

| Gene            | Primer Forward               | Primer Reverse               | Tm<br>(°C) | GenBank AN           |
|-----------------|------------------------------|------------------------------|------------|----------------------|
| <i>il 1b</i>    | GTGGATTGGGGTTTGAT<br>GTG     | GCTGGGGATGTGGACTTC           | 54°C       | NM_212844.2          |
| <i>cxcl8b.1</i> | ACTCGGACTGAAGGTGA<br>CTC     | CCACGTCTCGGTAGGATG<br>AG     | 58°C       | NM_001327985 (1)     |
| <i>il 10</i>    | GCTCATTGTGGAGGGC<br>TTTC     | ATTGGGGTTGTGGAGTGCT<br>T     | 56°C       | <u>NM_001020785</u>  |
| <i>sod 1</i>    | GTCGTCTGGCTTGTTGA<br>GTG     | TGTCAGCGGGCTAGTGCTT          | 60°C       | NM_131294            |
| <i>sod 2</i>    | CCGGACTATGTTAAGGC<br>CATCT   | ACACTCGGTTGCTCTCTTTT<br>CTCT | 60°C       | NM_199976 (1)        |
| <i>cat</i>      | CCAAGGTCTGGTCCCAT<br>AAA     | GCACATGGGTCCATCTCTC          | 60°C       | <u>NM_130912 (1)</u> |
| <i>rpl0</i>     | CTGAACATCTCGCCCTTC<br>TC     | TAGCCGATCTGCAGACAC<br>AC     | 60°C       | NM_131580            |
| <i>rpl 13a</i>  | TCTGGAGGACTGTAAGA<br>GGTATGC | AGACGCACAATCTTGAGA<br>GCAG   | 59°C       | NM_198143            |
